# Supplementary material
Source: PubMed Central journal article supplement (PMC8299542)

## Supplemental Figure 1

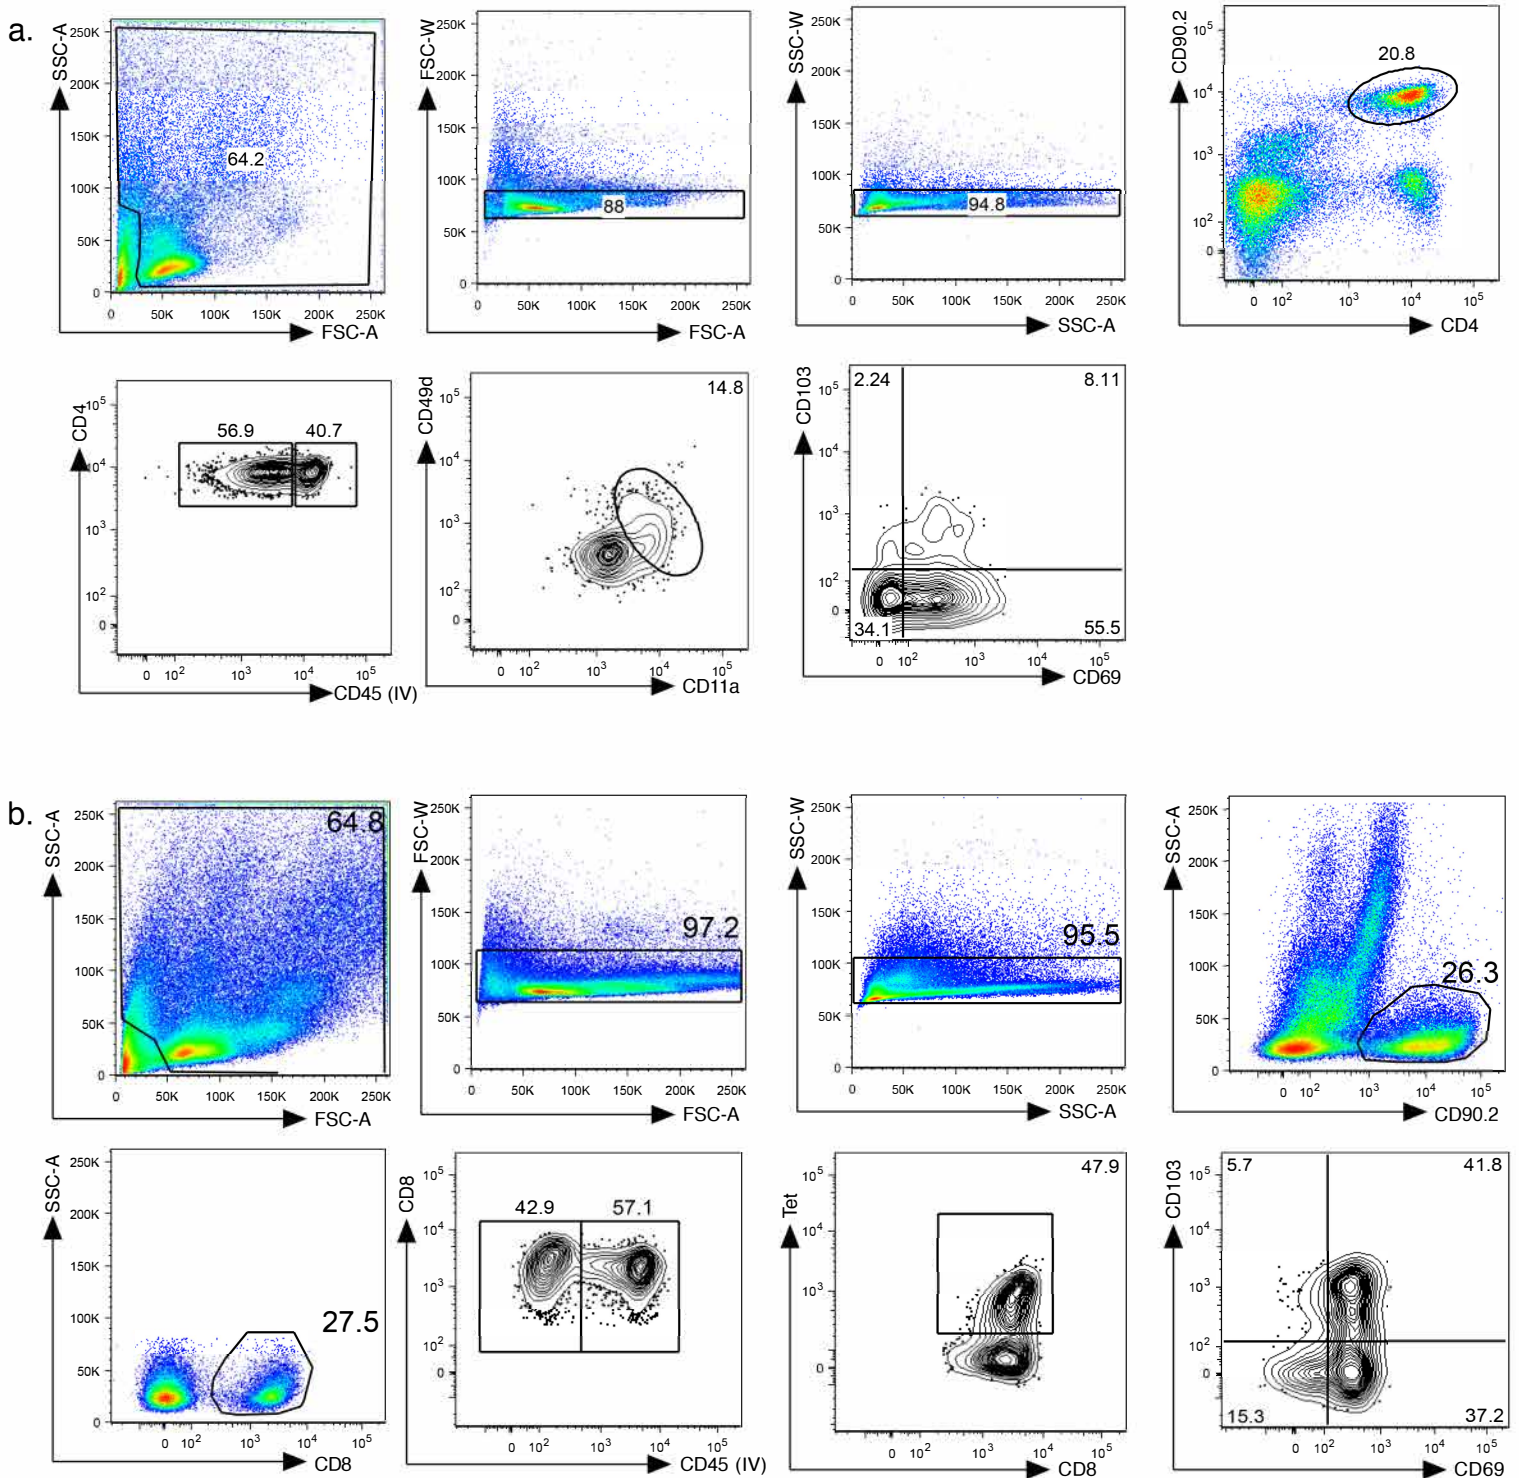

Supplement: NIHMS1724537-supplement-Supplemental_Figure_1.pdf [file NIHMS1724537-supplement-Supplemental_Figure_1.pdf]
